# Supplementary material for: The importance of tissue specificity for RNA-seq: highlighting the errors of composite structure extractions
Source: PubMed Central journal article supplement (PMC3765781; doi:10.1186/1471-2164-14-586), 2013-08-28

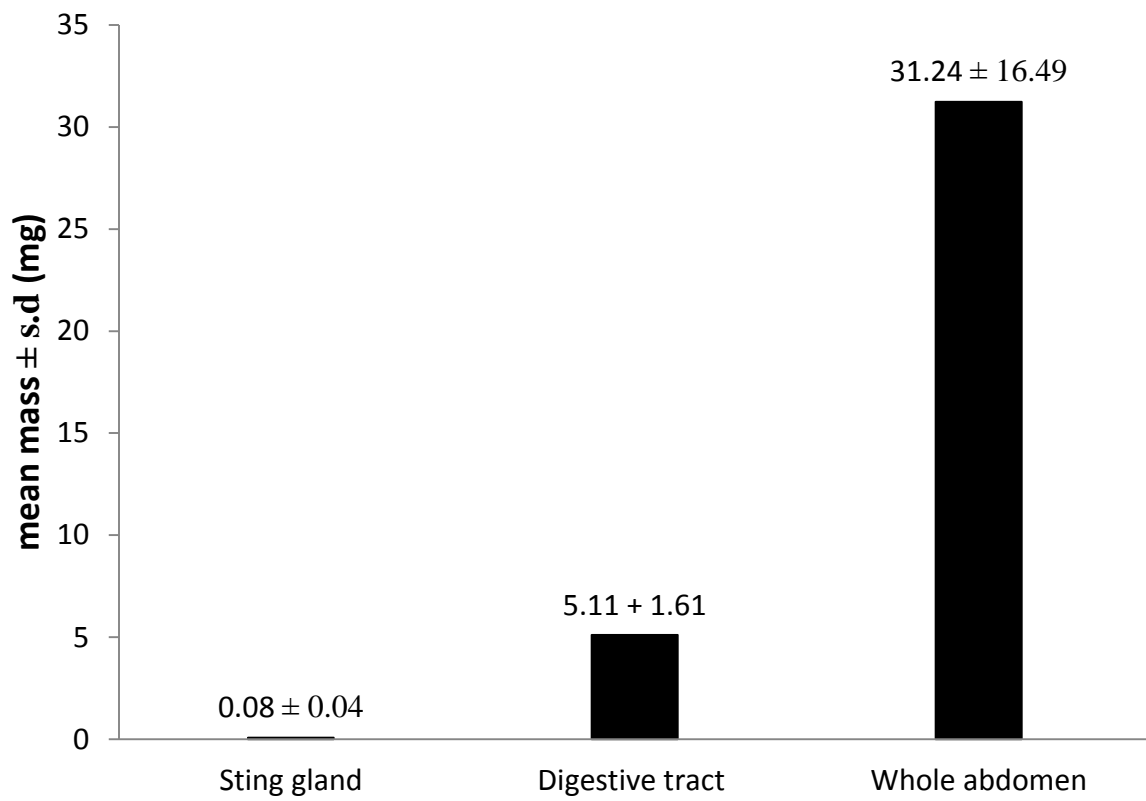

Supplement: 1471-2164-14-586-S7.pdf [file 1471-2164-14-586-S7.pdf]
